# Supplementary figures and images for: Automated digital counselling with social network support as a novel intervention for patients with heart failure: protocol for randomised controlled trial
Source: HighWire-hosted journal article supplement (doi:10.1136/bmjopen-2021-059635), 2022-09-01

# My Trackers: Active Living

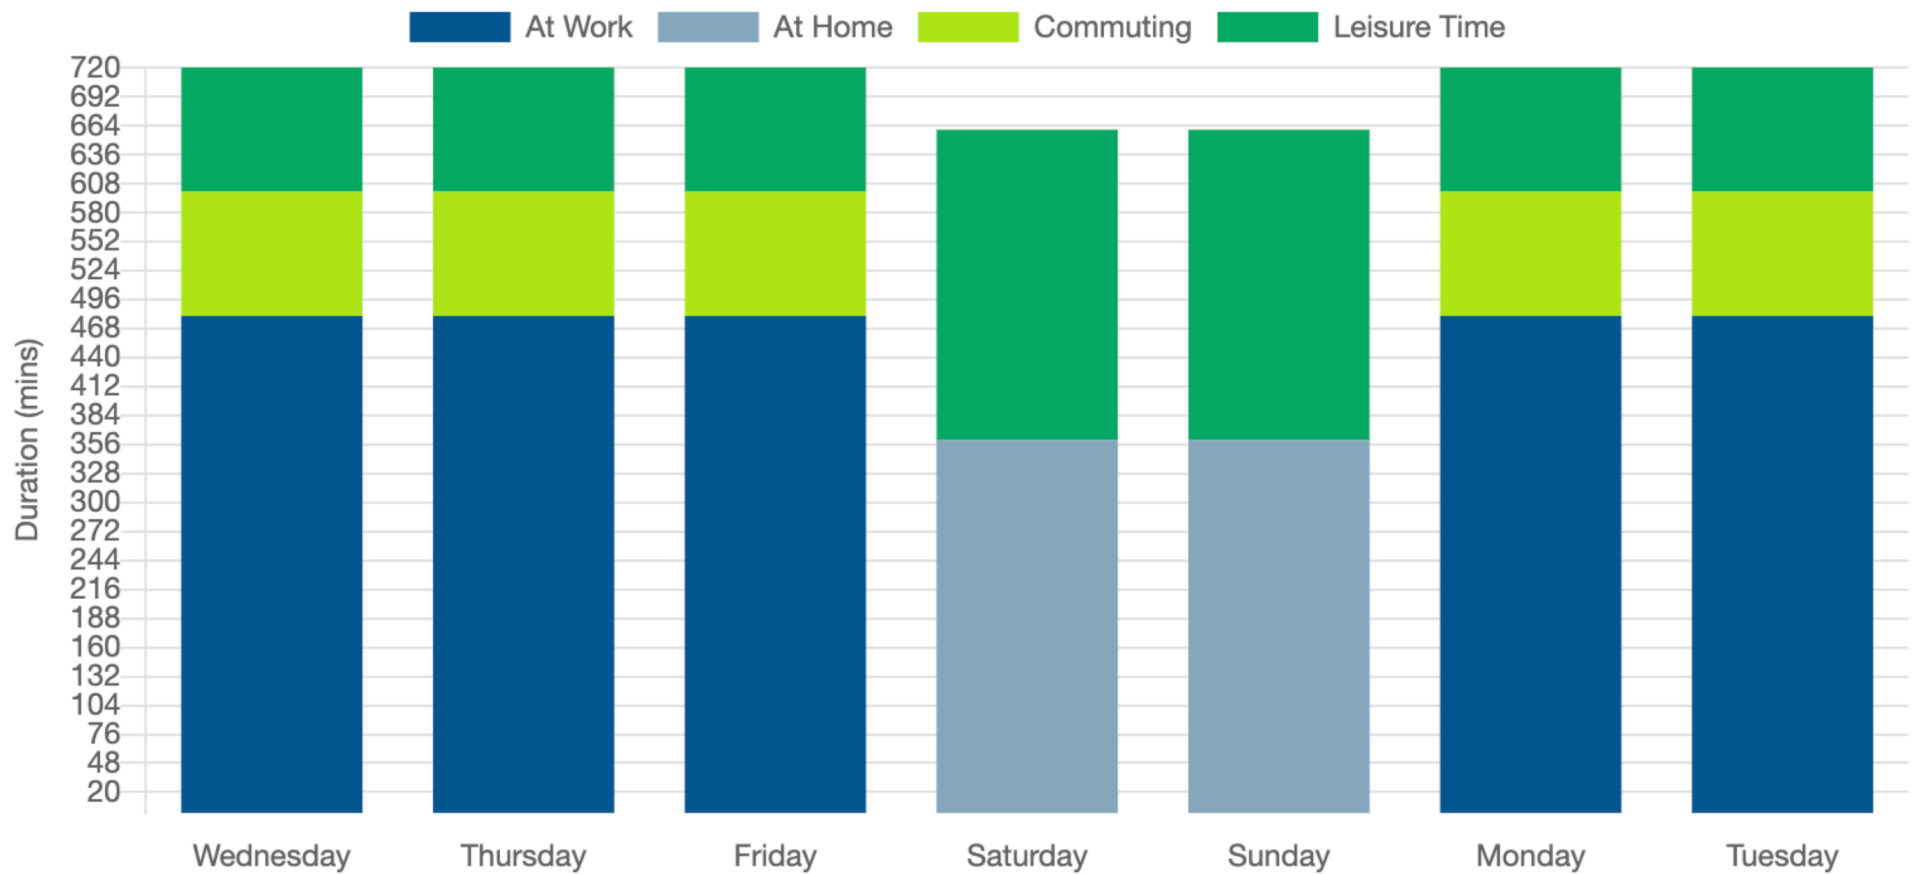

Supplement: bmjopen-2021-059635supp003_data_supplement.pdf [file bmjopen-2021-059635supp003_data_supplement.pdf]
